# Supplementary material
Source: Royal Society of Chemistry journal article supplement (doi:10.1039/d6ta01265e)
Supplement: d6ta01265e1.pdf [file d6ta01265e1.pdf]

## Supplementary Information

### Unveiling the role of a trinuclear copper(II) cluster in bifunctional OER and HER electrocatalysis: insights from experiment and theory

Sujan Sk,<sup>a</sup> Trishna Ghosh,<sup>a</sup> Aditi De,<sup>b</sup> Julia Klak,<sup>c</sup> Yutaka Hitomi,<sup>d</sup> Subrata Kundu\*,<sup>b</sup> and Manindranath Bera\*\*<sup>a</sup>

<sup>a</sup>Department of Chemistry, University of Kalyani, Nadia, West Bengal-741235, INDIA. <sup>b</sup>Process Engineering (EPE) Division, Central Electrochemical Research Institute, Karaikudi-630006, Tamil Nadu, INDIA, and Academy of Scientific and Innovative Research (AcSIR), Ghaziabad-201002, INDIA.

<sup>c</sup>Faculty of Chemistry, University of Wroclaw, Wroclaw 50383, POLAND.

<sup>d</sup>Department of Applied Chemistry, Doshisha University, 1-3 Tatara Miyakodani, Kyotanabe, Kyoto 610-0394, JAPAN.

#### Figures with Captions

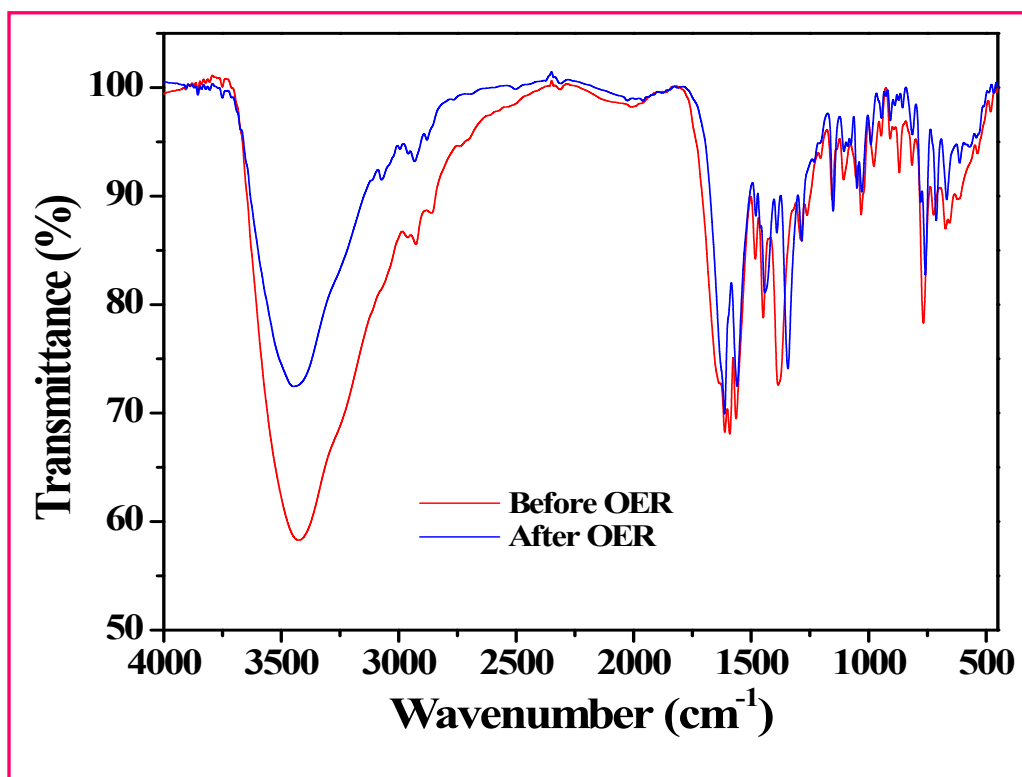

Fig. S1 FTIR spectra of  $[\text{Cu}_3(\text{L})(\text{OAc})(\text{Cl})_2]\cdot 3\text{H}_2\text{O}$  before (—) and after (—) OER studies in the region of 4000-450  $\text{cm}^{-1}$ .

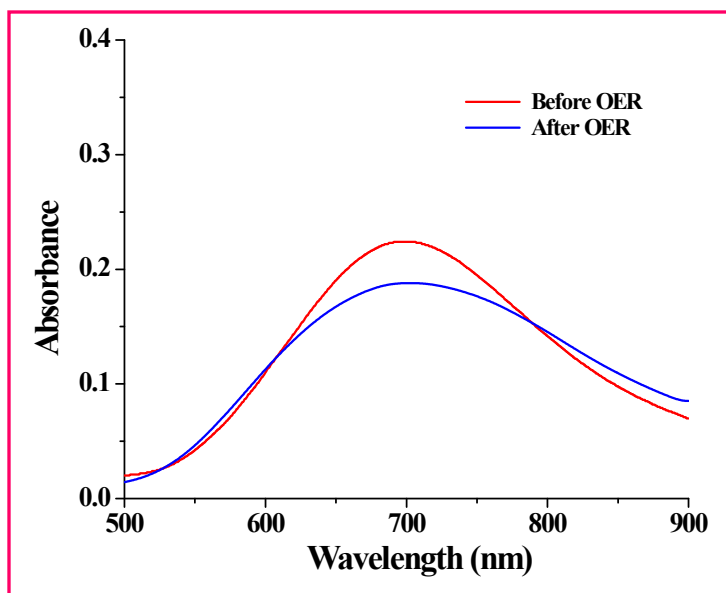

(a)

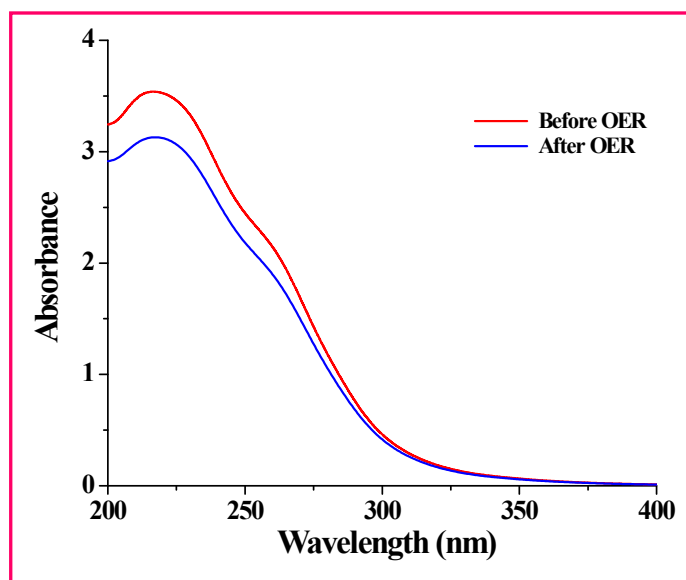

(b)

**Fig. S2** UV-Vis spectra of  $[\text{Cu}_3(\text{L})(\text{OAc})(\text{Cl})_2] \cdot 3\text{H}_2\text{O}$  before (—) and after (—) OER studies with (a)  $10^{-3}$  (M) and (b)  $10^{-4}$  (M) in MeOH solution.

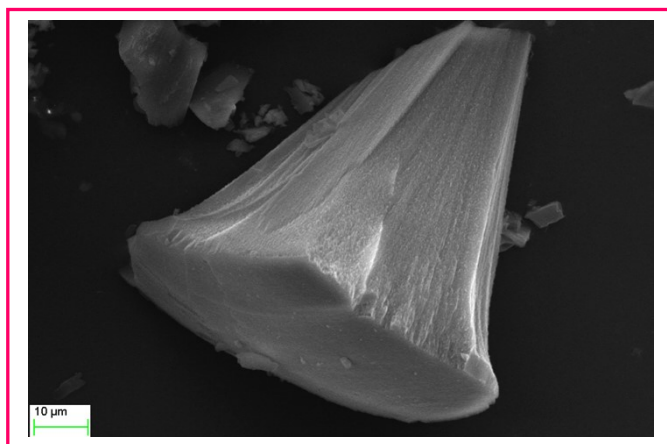

(a)

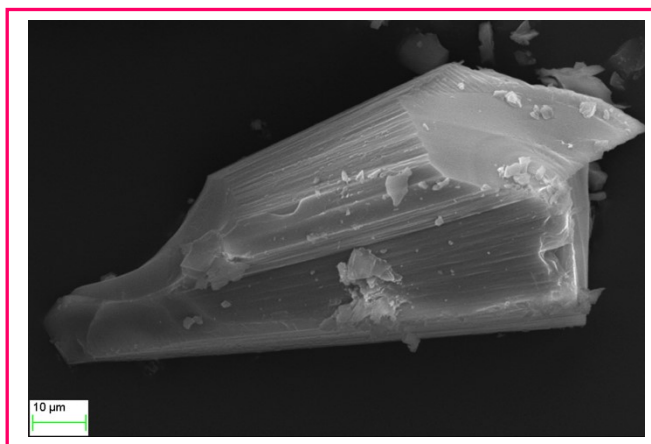

(b)

**Fig. S3** Scanning electron microscopic (FESEM) images of  $[\text{Cu}_3(\text{L})(\text{OAc})(\text{Cl})_2] \cdot 3\text{H}_2\text{O}$  (a) before and (b) after OER studies.

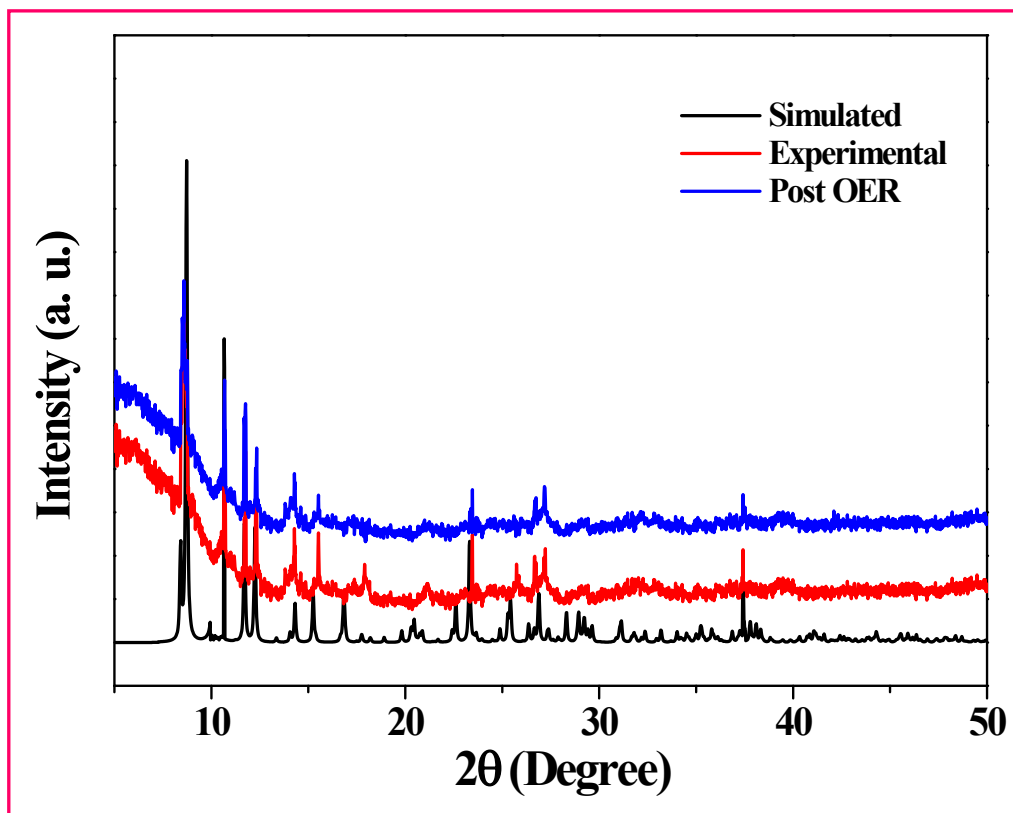

**Fig. S4** Powder X-ray diffraction (PXRD) patterns of  $[\text{Cu}_3(\text{L})(\text{OAc})(\text{Cl})_2] \cdot 3\text{H}_2\text{O}$ : simulated PXRD (—), and experimental PXRD before (—) and after (—) OER studies.

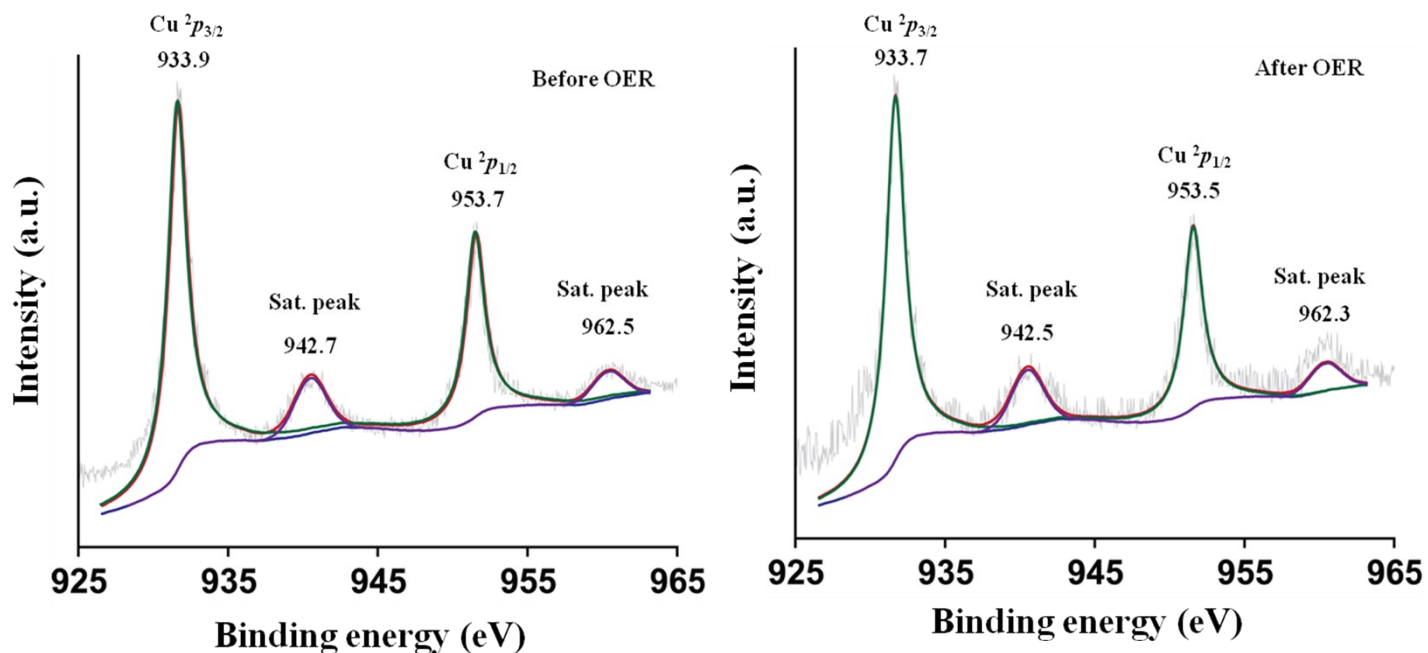

**Fig. S5** X-ray photoelectron spectroscopy (XPS) of  $[\text{Cu}_3(\text{L})(\text{OAc})(\text{Cl})_2] \cdot 3\text{H}_2\text{O}$  before and after OER studies.

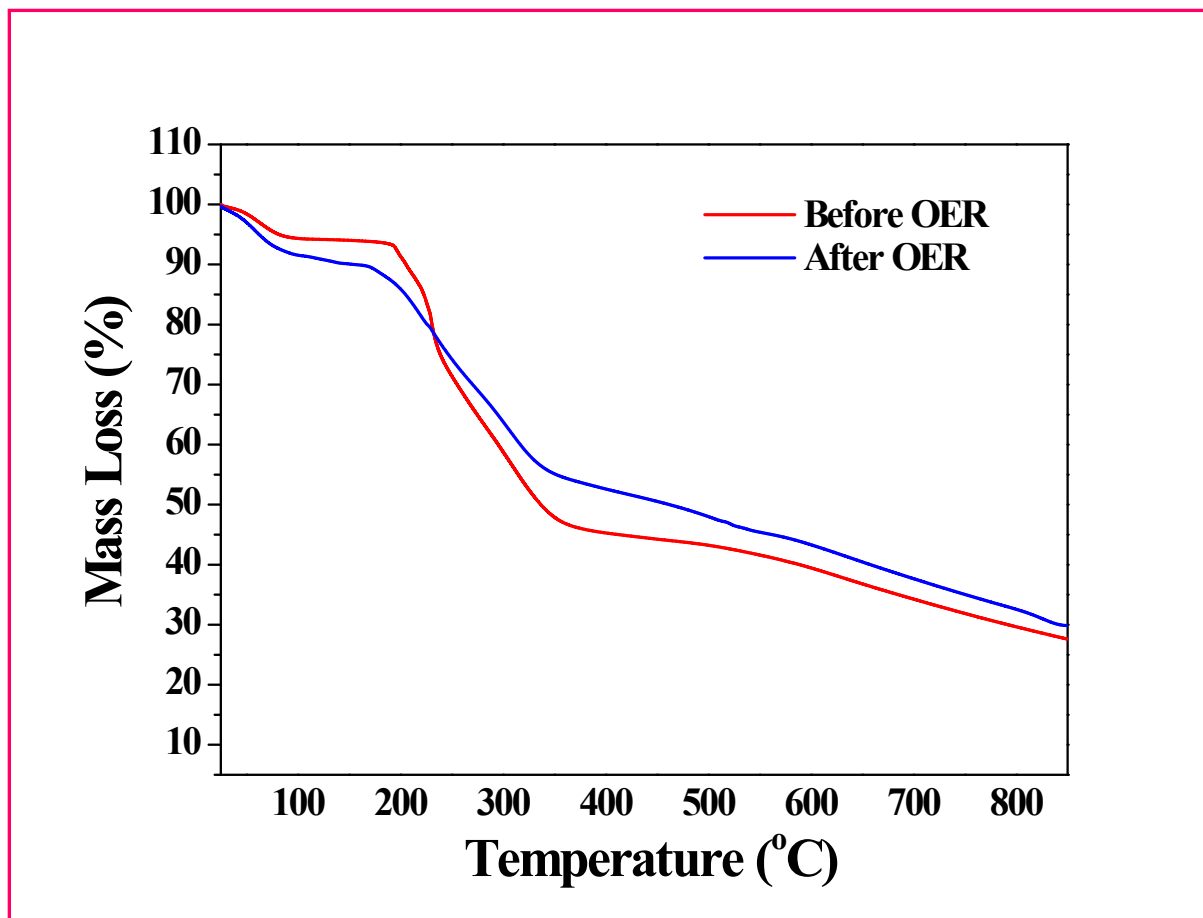

**Fig. S6** TGA profiles of  $[\text{Cu}_3(\text{L})(\text{OAc})(\text{Cl})_2] \cdot 3\text{H}_2\text{O}$  (a) before and (b) after OER studies under an atmosphere of  $\text{N}_2$  gas at a heating rate of  $\sim 10^\circ\text{C}/\text{min}$ .

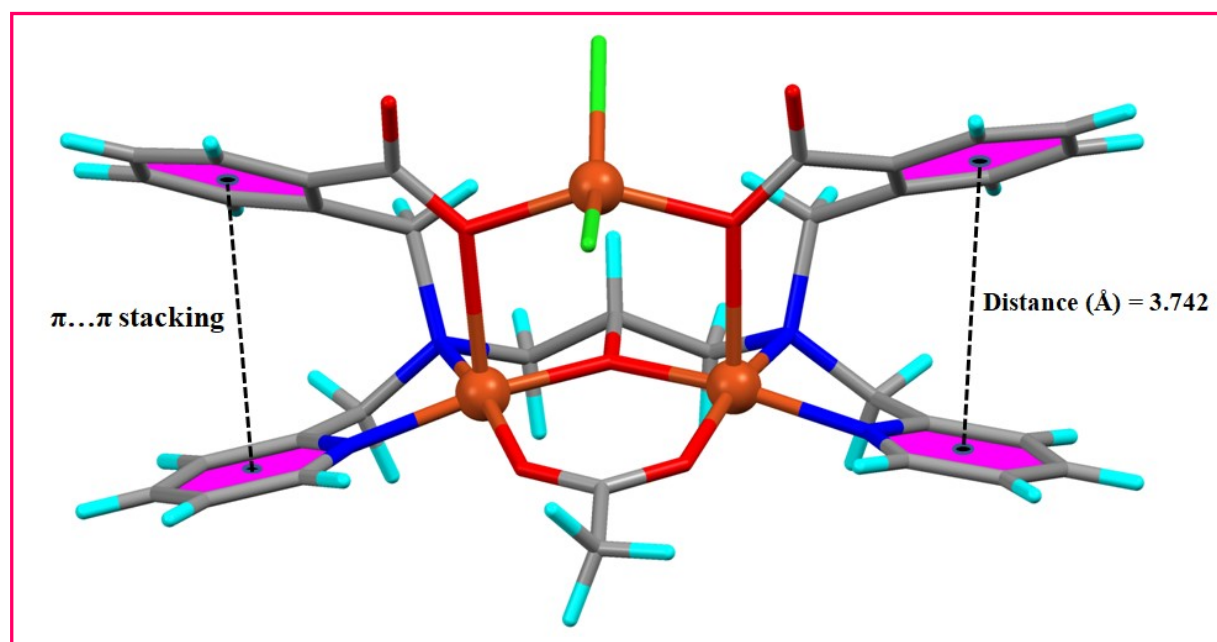

**Fig. S7** A view of  $[\text{Cu}_3(\text{L})(\text{OAc})(\text{Cl})_2] \cdot 3\text{H}_2\text{O}$  showing intra-molecular  $\pi \cdots \pi$  stacking interactions.

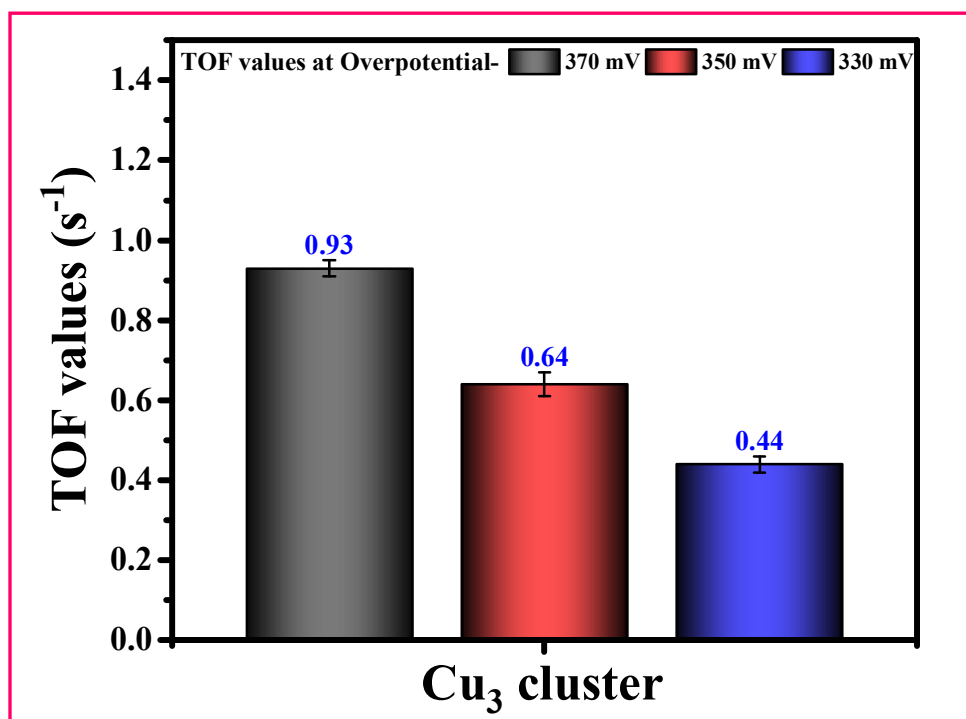

**Fig. S8** Bar diagram showing turnover frequency (TOF) values of catalyst  $[\text{Cu}_3(\text{L})(\text{OAc})(\text{Cl})_2] \cdot 3\text{H}_2\text{O}$  for OER calculated at various overpotentials (330, 350 and 370 mV).

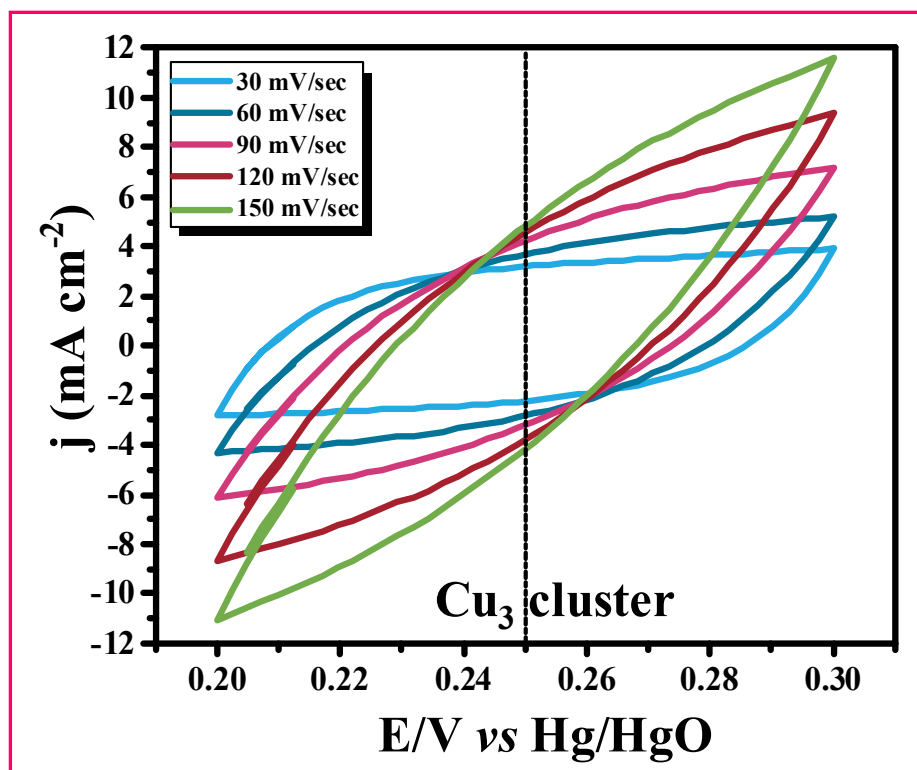

**Fig. S9** The CV outcomes of  $[\text{Cu}_3(\text{L})(\text{OAc})(\text{Cl})_2] \cdot 3\text{H}_2\text{O}$  for OER studies under the non-Faradaic region at various scan rates.

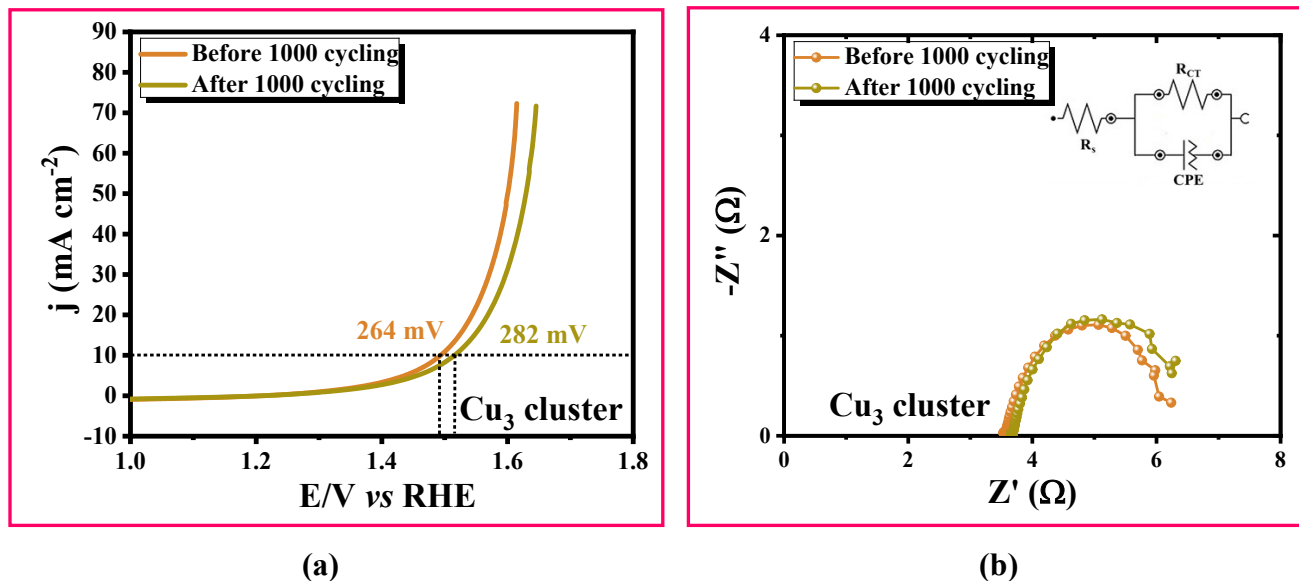

**Fig. S10** (a) LSV outcomes, and (b) EIS results of  $[\text{Cu}_3(\text{L})(\text{OAc})(\text{Cl})_2] \cdot 3\text{H}_2\text{O}$  before and after the OER-AD studies.

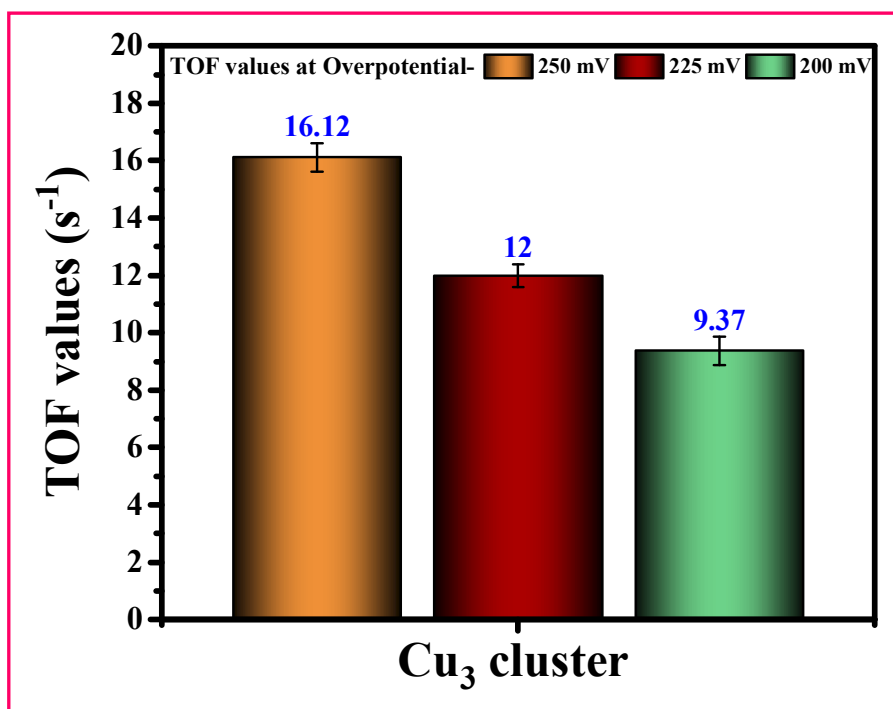

**Fig. S11** Bar diagram showing turnover frequency (TOF) values of catalyst  $[\text{Cu}_3(\text{L})(\text{OAc})(\text{Cl})_2] \cdot 3\text{H}_2\text{O}$  for HER calculated at various overpotentials (200, 225 and 250 mV).

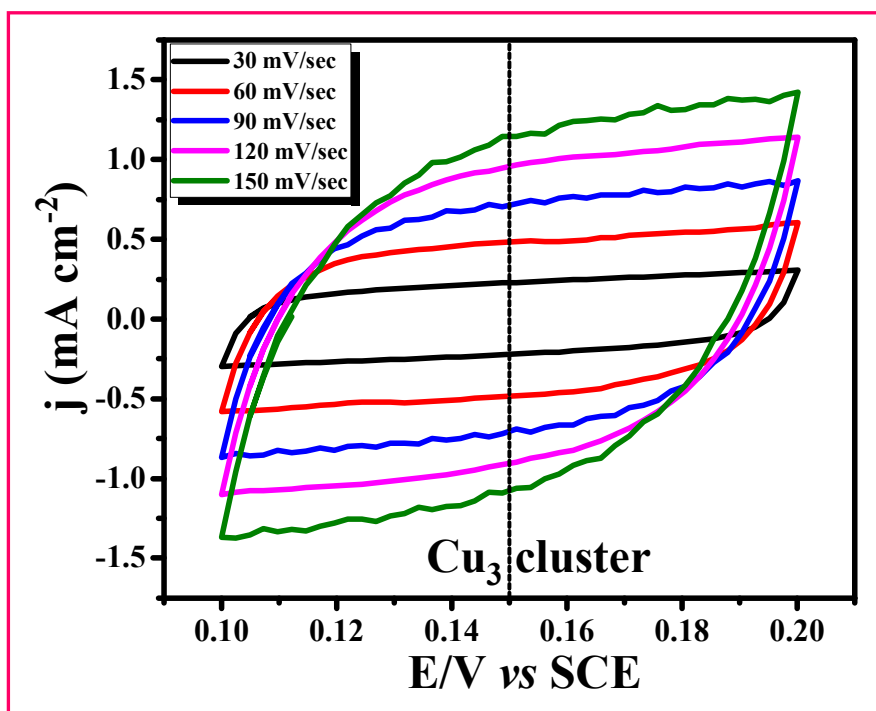

**Fig. S12** CV outcomes of  $[\text{Cu}_3(\text{L})(\text{OAc})(\text{Cl})_2]\cdot 3\text{H}_2\text{O}$  for HER studies under the non-Faradaic region at various scan rates.

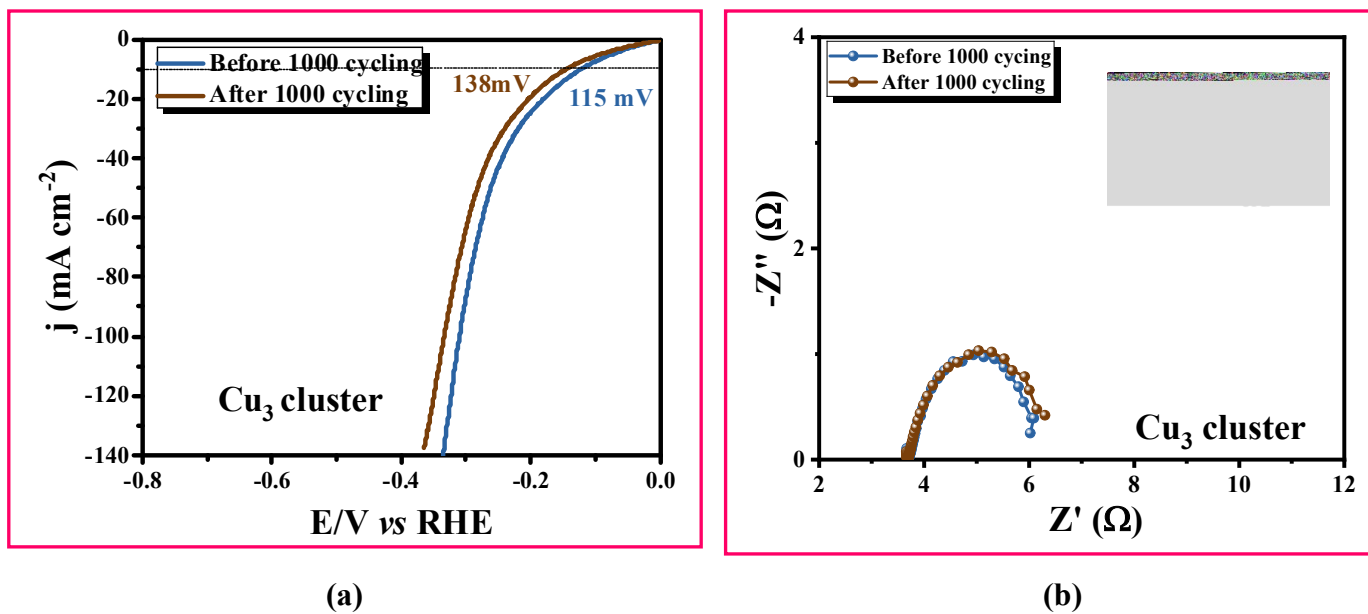

**Fig. S13** (a) LSV outcomes and (b) EIS results of  $[\text{Cu}_3(\text{L})(\text{OAc})(\text{Cl})_2]\cdot 3\text{H}_2\text{O}$  before and after the HER-AD studies.

## Tables with Captions

**Table S1** X-ray crystallographic data and parameters for  $[\text{Cu}_3(\text{L})(\mu\text{-OAc})\text{Cl}_2]\cdot 3\text{H}_2\text{O}$

|                                                    | $[\text{Cu}_3(\text{L})(\mu\text{-OAc})\text{Cl}_2]\cdot 3\text{H}_2\text{O}$ |
|----------------------------------------------------|-------------------------------------------------------------------------------|
| Empirical formula                                  | $\text{C}_{33}\text{H}_{38}\text{N}_4\text{O}_{10}\text{Cl}_2\text{Cu}_3$     |
| Formula weight                                     | 912.22                                                                        |
| Crystal system                                     | Orthorhombic                                                                  |
| Space group                                        | <i>Pnma</i>                                                                   |
| <i>a</i> , Å                                       | 17.22(14)                                                                     |
| <i>b</i> , Å                                       | 15.72(11)                                                                     |
| <i>c</i> , Å                                       | 13.25(10)                                                                     |
| $\alpha$ , deg                                     | 90                                                                            |
| $\beta$ , deg                                      | 90                                                                            |
| $\gamma$ , deg                                     | 90                                                                            |
| <i>V</i> , Å <sup>3</sup>                          | 3587(47)                                                                      |
| <i>Z</i>                                           | 4                                                                             |
| $\rho$ , Mg/m <sup>3</sup>                         | 1.678                                                                         |
| Wavelength, Å                                      | 0.71073                                                                       |
| Temperature, K                                     | 302(2)                                                                        |
| F(000)                                             | 1836                                                                          |
| $\mu$ , mm <sup>-1</sup>                           | 1.973                                                                         |
| $\theta$ range, deg                                | 1.735 to 24.895                                                               |
| Reflections collected                              | 3415                                                                          |
| Independent reflections                            | 1956                                                                          |
| $R(F_{\text{obsd}} \text{ data}) [I > 2\sigma(I)]$ | 0.0745                                                                        |
| $wR(F^2 \text{ all data})$                         | 0.1690                                                                        |
| Goodness-of-fit on $F^2$                           | 1.089                                                                         |
| Largest diff. peak and hole, e/Å <sup>3</sup>      | + 1.511 to -0.719                                                             |

$$wR2 = \{\sum [w(F_o^2 - F_c^2)^2] / \sum [w(F_o^2)^2]\}^{1/2}; R1 = \sum ||F_o| - |F_c|| / \sum |F_o|$$

**Table S2** Selected bond distances (Å) and angles (deg) for [Cu<sub>3</sub>(L)(μ-OAc)Cl<sub>2</sub>] $\cdot$ 3H<sub>2</sub>O

| Bond distances (Å) |           |                 |           |
|--------------------|-----------|-----------------|-----------|
| Cu(1)-O(1)         | 1.834(13) | Cu(2)-N(1)      | 2.124(16) |
| Cu(1)-Cl(7)        | 2.384(18) | Cu(2)-N(2)      | 1.822(14) |
| Cu(1)-Cl(8)        | 2.346(14) | Cu(2)-O(3)      | 1.780(11) |
| Cu(2)-O(1)         | 2.316(15) | Cu(2)-O(2)      | 2.007(13) |
| Bond angles (deg)  |           |                 |           |
| O(1)-Cu(1)-O(1')   | 135.2(6)  | O(3)-Cu(2)-N(2) | 161.90(4) |
| O(1)-Cu(1)-Cl(7)   | 100.9(3)  | N(1)-Cu(2)-N(2) | 86.50(4)  |
| O(1')-Cu(1)-Cl(7)  | 100.9(3)  | O(3)-Cu(2)-N(1) | 80.60(5)  |
| O(1)-Cu(1)-Cl(8)   | 91.40(3)  | O(2)-Cu(2)-N(2) | 89.90(4)  |
| O(1')-Cu(1)-Cl(8)  | 91.40(3)  | O(2)-Cu(2)-N(1) | 169.30(3) |
| O(1)-Cu(2)-O(2)    | 94.00(6)  | O(2)-Cu(2)-O(3) | 100.50(5) |
| O(1)-Cu(2)-O(3)    | 92.40(4)  | O(1)-Cu(2)-N(2) | 101.70(4) |
| O(1)-Cu(2)-N(1)    | 96.60(6)  |                 |           |

**Table S3** TOF calculation for catalyst  $[\text{Cu}_3(\text{L})(\text{OAc})(\text{Cl})_2]\cdot 3\text{H}_2\text{O}$  for OER

| Scan Rate (V/s) | Surface Area (VA) | Associated Charge (C) | F (C/mol) | n | No. of Electron Transfer | J (A/cm <sup>2</sup> ) | N <sub>A</sub>         | J×N <sub>A</sub>     | (n × F × τ)           | TOF (s <sup>-1</sup> ) | Measured at Potential vs. RHE (V) | Overpotential (mV) |
|-----------------|-------------------|-----------------------|-----------|---|--------------------------|------------------------|------------------------|----------------------|-----------------------|------------------------|-----------------------------------|--------------------|
| 0.03            | 0.000419          | 0.013967              | 96485     | 4 | 8.7183×10 <sup>16</sup>  | 0.025                  | 6.023×10 <sup>23</sup> | 1.5×10 <sup>22</sup> | 3.36×10 <sup>22</sup> | 0.448                  | 1.56                              | 330                |
| 0.03            | 0.000419          | 0.013967              | 96485     | 4 | 8.7183×10 <sup>16</sup>  | 0.036                  | 6.023×10 <sup>23</sup> | 2.2×10 <sup>22</sup> | 3.36×10 <sup>22</sup> | 0.644                  | 1.58                              | 350                |
| 0.03            | 0.000419          | 0.013967              | 96485     | 4 | 8.7183×10 <sup>16</sup>  | 0.052                  | 6.023×10 <sup>23</sup> | 3.1×10 <sup>22</sup> | 3.36×10 <sup>22</sup> | 0.930                  | 1.60                              | 370                |

**Table S4** The electrochemical kinetic, activity and OER performance-based parameters of catalyst  $[\text{Cu}_3(\text{L})(\text{OAc})(\text{Cl})_2]\cdot 3\text{H}_2\text{O}$ 

| Parameters                                 | Cu <sub>3</sub> catalyst | RuO <sub>2</sub> |
|--------------------------------------------|--------------------------|------------------|
| EIS R <sub>ct</sub> (Ω)                    | 2.72                     | 6.57             |
| EIS R <sub>s</sub> (Ω)                     | 3.48                     | 6.12             |
| ECSA (cm <sup>2</sup> )                    | 373.75                   | -                |
| Overpotential @ 10 mA/cm <sup>2</sup> (mV) | 1.494 V (264 mV)         | 1.491 V (370 mV) |
| Overpotential @ 20 mA/cm <sup>2</sup> (mV) | 1.543 V (313 mV)         | 1.63 V (400 mV)  |
| Overpotential @ 30 mA/cm <sup>2</sup> (mV) | 1.57 V (340 mV)          | 1.65 V (420 mV)  |
| C <sub>dl</sub> (mF/cm <sup>2</sup> )      | 14.945                   | -                |
| Mass loading (mg)                          | 1.1                      | -                |
| Tafel slope (mV/dec)                       | 65.01                    | 76.85            |

**Table S5** TOF calculation of catalyst  $[\text{Cu}_3(\text{L})(\text{OAc})(\text{Cl})_2] \cdot 3\text{H}_2\text{O}$  for HER

| Scan Rate (V/s) | Surface Area (VA) | Associated Charge (C) | F (C/mol) | n | No of Electrons Transfer | J (A/cm <sup>2</sup> ) | N <sub>A</sub>         | J×N <sub>A</sub>     | (n × F× τ)           | TOF (s <sup>-1</sup> ) | Measured at Potential vs. RHE (V) | Over-potential (mV) |
|-----------------|-------------------|-----------------------|-----------|---|--------------------------|------------------------|------------------------|----------------------|----------------------|------------------------|-----------------------------------|---------------------|
| 0.03            | 0.00004           | 0.001333              | 96485     | 2 | 8.32×10 <sup>15</sup>    | 0.025                  | 6.023×10 <sup>23</sup> | 1.5×10 <sup>22</sup> | 1.6×10 <sup>21</sup> | 9.375                  | 0.200                             | 200                 |
| 0.03            | 0.00004           | 0.001333              | 96485     | 2 | 8.32×10 <sup>15</sup>    | 0.032                  | 6.023×10 <sup>23</sup> | 1.9×10 <sup>22</sup> | 1.6×10 <sup>21</sup> | 12.000                 | 0.225                             | 225                 |
| 0.03            | 0.00004           | 0.001333              | 96485     | 2 | 8.32×10 <sup>15</sup>    | 0.043                  | 6.023×10 <sup>23</sup> | 2.6×10 <sup>22</sup> | 1.6×10 <sup>21</sup> | 16.126                 | 0.250                             | 250                 |

**Table S6** The electrochemical kinetic, activity and HER performance-based parameters of catalyst  $[\text{Cu}_3(\text{L})(\text{OAc})(\text{Cl})_2] \cdot 3\text{H}_2\text{O}$ 

| Parameters                                 | Cu <sub>3</sub> catalyst | Pt/C             |
|--------------------------------------------|--------------------------|------------------|
| EIS R <sub>ct</sub> (Ω)                    | 2.46                     | 0.97             |
| EIS R <sub>s</sub> (Ω)                     | 3.66                     | 1.27             |
| ECSA (cm <sup>2</sup> )                    | 183.75                   | -                |
| Overpotential @ 10 mA/cm <sup>2</sup> (mV) | -0.115 V (115 mV)        | -0.036 V (36 mV) |
| Overpotential @ 20 mA/cm <sup>2</sup> (mV) | -0.181 V (181 mV)        | -0.058 V (58 mV) |
| Overpotential @ 30 mA/cm <sup>2</sup> (mV) | -0.219 V (219 mV)        | -0.066 V (66 mV) |
| C <sub>dl</sub> (mF/cm <sup>2</sup> )      | 7.35                     | -                |
| Mass loading (mg)                          | 1.1                      | -                |
| Tafel slope (mV/dec)                       | 42.45                    | 32.97            |

**Table S7** Energies of the different intermediate species with a schematic diagram observed during the OER process computed by DFT method

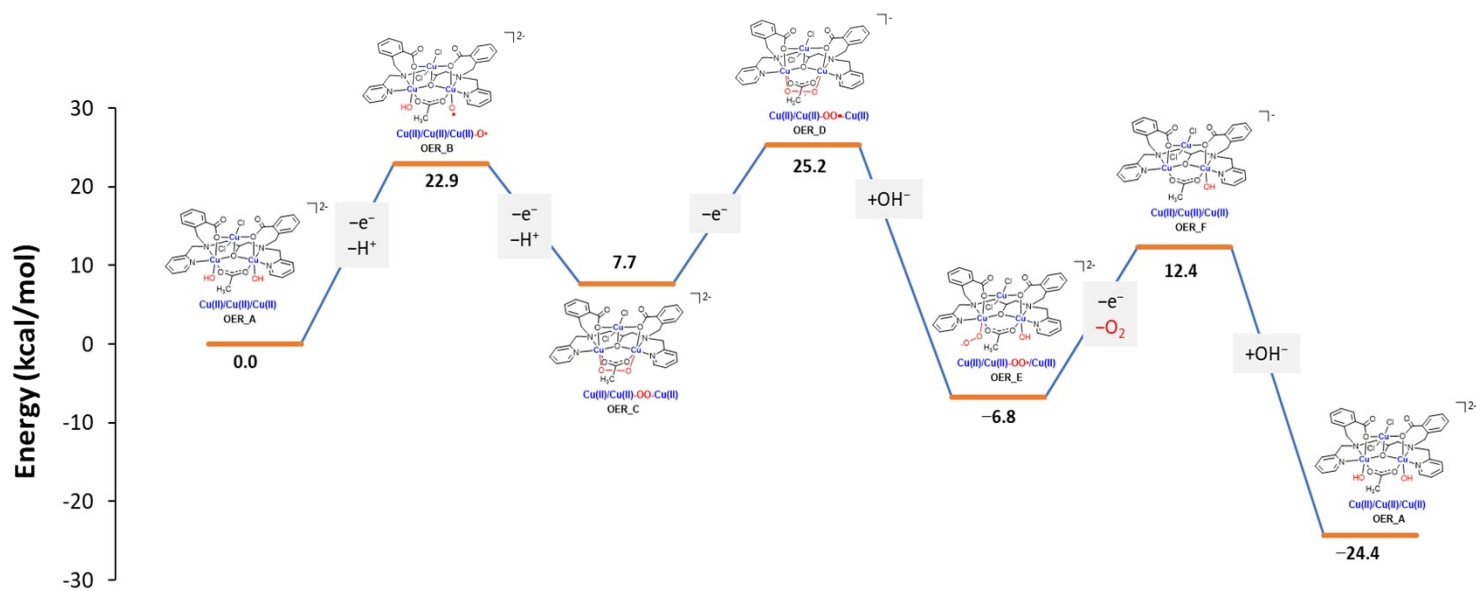

| Species                                                                                                                              | Energy/Hartree | Energy/kcal mol <sup>-1</sup> |
|--------------------------------------------------------------------------------------------------------------------------------------|----------------|-------------------------------|
| 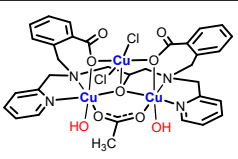 <p><b>Cu(II)/Cu(II)/Cu(II)</b><br/>OER_A</p>       | -8012.90684634 | -5028179.175                  |
|  <p><b>Cu(II)/Cu(II)/Cu(II)-O•</b><br/>OER_B</p>    | -8012.23735028 | -5027759.06                   |
|  <p><b>Cu(II)/Cu(II)-OO-Cu(II)</b><br/>OER_C</p>    | -8011.62865274 | -5027377.096                  |
|  <p><b>Cu(II)/Cu(II)-OO•-Cu(II)</b><br/>OER_D</p>  | -8011.50962433 | -5027302.404                  |
|  <p><b>Cu(II)/Cu(II)-OO•/Cu(II)</b><br/>OER_E</p> | -8087.34614147 | -5074890.577                  |
|  <p><b>Cu(II)/Cu(II)/Cu(II)</b><br/>OER_F</p>     | -7937.062902   | -4980586.341                  |

**Table S8** Energies of the different intermediate species with a schematic diagram observed during the HER process computed by DFT method

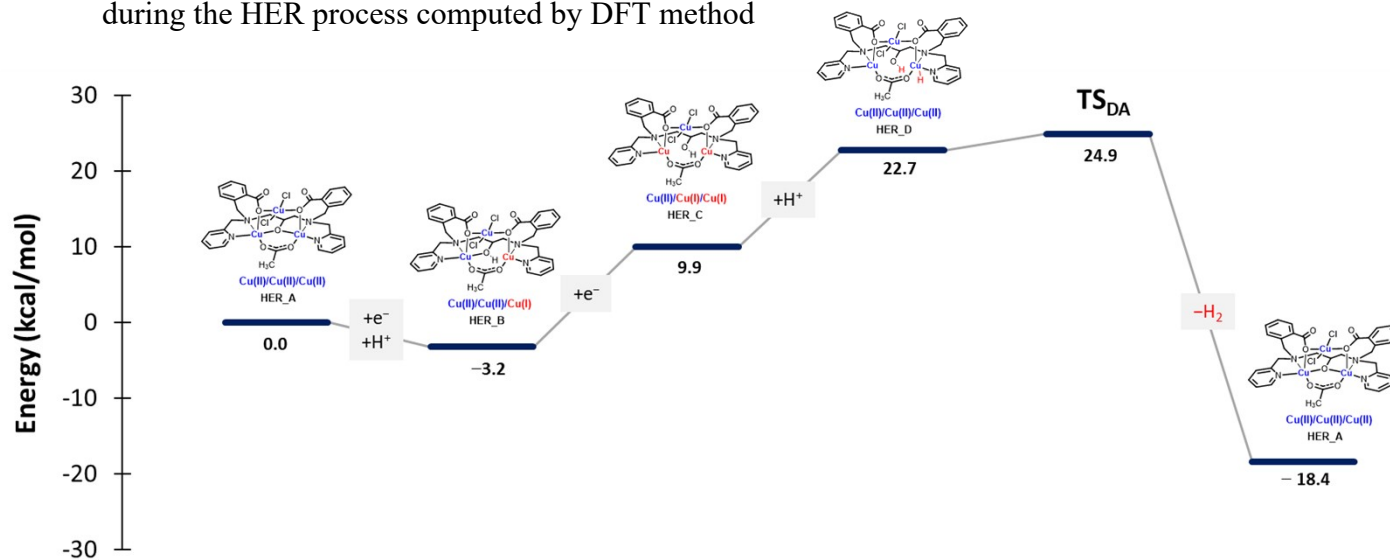

| Species                                                                                                                          | Energy/Hartree | Energy/kcal mol <sup>-1</sup> |
|----------------------------------------------------------------------------------------------------------------------------------|----------------|-------------------------------|
| 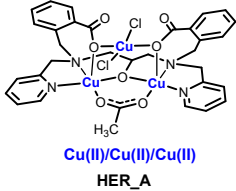 <p><b>Cu(II)/Cu(II)/Cu(II)</b><br/>HER_A</p> | -7861.221237   | -4932994.938                  |

|                                                                                                                                                     |              |              |
|-----------------------------------------------------------------------------------------------------------------------------------------------------|--------------|--------------|
| 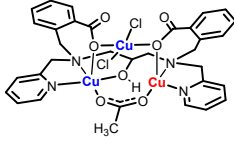 <p style="text-align: center;">Cu(II)/Cu(II)/Cu(I)<br/>HER_B</p>  | -7861.796231 | -4933355.753 |
|  <p style="text-align: center;">Cu(II)/Cu(I)/Cu(I)<br/>HER_C</p>   | -7861.938761 | -4933445.192 |
|  <p style="text-align: center;">Cu(II)/Cu(II)/Cu(II)<br/>HER_D</p> | -7862.324784 | -4933687.425 |

***Determination of Turnover Frequency (TOF), Surface Concentration, Surface Charge of the Cu<sub>3</sub> Catalyst for OER from C<sub>dl</sub>-Derived CV Curve at a Low Scan Rate of 30 mV s<sup>-1</sup>:***

Calculated integrated area acquired from C<sub>dl</sub>-derived CV curve at a low scan rate of 30 mV s<sup>-1</sup> = 0.000419 VAc m<sup>-2</sup>

Hence, the associated surface charge (Q) = 0.000419 VAc m<sup>-2</sup> / 30 mVs<sup>-1</sup>

$$= 0.013967 \text{ Asc m}^{-2}$$

$$= \mathbf{0.013967 \text{ C cm}^{-2}}$$

Now, the number of electrons transferred = 0.013967 C cm<sup>-2</sup> / 1.602 × 10<sup>-19</sup> C

$$= \mathbf{8.71 \times 10^{16} \text{ cm}^{-2}}$$
 (electrode area 1\*1 cm<sup>2</sup>)

The corresponding expression to determine the Turnover Frequency (TOF) from OER current density is,

$$TOF = \frac{j \times N_A}{n \times F \times \tau} \dots \dots \dots (S1)$$

where,  $j$  = current density,  $N_A$  = Avogadro number,  $F$  = Faraday constant,  $n$  = number of electrons for OER = 4,  $\Gamma$  = surface concentration.

Hence, we have,

$$\begin{aligned} \text{TOF}_{\Gamma(\text{CV})@370 \text{ mV}} &= [(0.052) \text{ Acm}^{-2} (6.023 \times 10^{23}) \text{ mol}^{-1}] / [(96485) \text{ Cmol}^{-1} (4) (8.71 \times 10^{16}) \text{ cm}^{-2}] \\ &= \mathbf{0.930 \text{ sec}^{-1}} \end{aligned}$$

***Determination of Turnover Frequency (TOF), Surface Concentration, Surface Charge of the Cu<sub>3</sub> Catalyst for HER from C<sub>dl</sub>-Derived CV Curve at a Low Scan Rate of 30 mV s<sup>-1</sup>:***

Calculated integrated area acquired from C<sub>dl</sub>-derived CV curve at a low scan rate of 30 mV s<sup>-1</sup> = 0.00004 VAcm<sup>-2</sup>

Hence, the associated surface charge (Q) = 0.00004 VAcm<sup>-2</sup> / 30 mVs<sup>-1</sup>

$$\begin{aligned} &= 0.0013333 \text{ Acm}^{-2} \\ &= \mathbf{0.0013333 \text{ C cm}^{-2}} \end{aligned}$$

Now, the number of electrons transferred = 0.0013333 C cm<sup>-2</sup> / 1.602 × 10<sup>-19</sup> C

$$= \mathbf{8.32 \times 10^{15} \text{ cm}^{-2}} \text{ (electrode area } 1 \times 1 \text{ cm}^2)$$

The corresponding expression to determine the Turnover Frequency (TOF) from OER current density is,

$$\text{TOF} = \frac{j \times N_A}{n \times F \times \Gamma} \dots\dots\dots (S1)$$

where,  $j$  = current density,  $N_A$  = Avogadro number,  $F$  = Faraday constant,  $n$  = number of electrons for HER = 2,  $\Gamma$  = surface concentration.

Hence, we have,

$$\begin{aligned} \text{TOF}_{\Gamma(\text{CV})@250 \text{ mV}} &= [(0.043) \text{ Acm}^{-2} (6.023 \times 10^{23}) \text{ mol}^{-1}] / [(96485) \text{ Cmol}^{-1} (4) (8.32 \times 10^{15}) \text{ cm}^{-2}] \\ &= \mathbf{16.12 \text{ sec}^{-1}} \end{aligned}$$
